# Supplementary material for: A Systematic Review and Meta‐Analysis on a Disease in TCM: Astragalus Injection for Gathering Qi Depression
Source: Hindawi journal article supplement (doi:10.1155/2020/2803478), 2020-01-01
Supplement: f1 [file 2803478.f1.pdf]

| Researcher name/year | Reported disease                                      | Sample size (Experimental group/Control group) | Sex (male/female)                               | age                                                       | Course of the disease                                            | conventional therapy                                                                                                                                                                   | Usage and dosage of Astragalus injection                                                                              | Outcome indicators |
|----------------------|-------------------------------------------------------|------------------------------------------------|-------------------------------------------------|-----------------------------------------------------------|------------------------------------------------------------------|----------------------------------------------------------------------------------------------------------------------------------------------------------------------------------------|-----------------------------------------------------------------------------------------------------------------------|--------------------|
| Li 2018              | Pulmonary heart disease with congestive heart failure | 90 (45/45)                                     | Experimental group 28/17<br>Control group 26/19 | Experimental group 61.29±3.37<br>Control group 62.38±3.44 | Experimental group 9.87±3.55<br>Control group 10.45±3.67 (month) | All patients were given guidance instructed to rest on time. Metoprolol was given twice a day, 6.25 mg each time for 15 days.                                                          | Astragalus injection was injected intravenously into 50 g/L glucose solution once a day, 40 ml each time for 15 days. | 2                  |
| Zhong 2016           | Chronic congestive heart failure                      | 118(59/59)                                     | Experimental group 35/27<br>Control group 32/27 | Experimental group 66.27±3.41<br>Control group 66.43±3.52 | Experimental group 3.14±1.13<br>Control group 3.26±1.19 (year)   | Symptomatic supportive treatment such as bed rest, continuous low flow oxygen inhalation, cardiac tonicity, diuresis, vasodilation, and digitalis drugs should be used when necessary. | Astragalus injection 60 ml + saline 250 ml intravenous drip once a day for 28 days                                    | 2                  |
| Wang 2016            | Acute respiratory distress syndrome                   | 100(50/50)                                     |                                                 | Experimental group 43.4±4.10<br>Control group 43.4±4.60   |                                                                  | Mechanical ventilation, anti-infection, liquid therapy                                                                                                                                 | Astragalus injection 20 ml + saline to 100 ml intravenous drip once a day for 5 days                                  | 1                  |
| Jia 2013             | Chronic heart failure                                 | 98(49/49)                                      | Experimental group 23/26                        | Experimental group                                        | Experimental group                                               | Angiotensin-converting enzyme inhibitors (lisinopril tablets),                                                                                                                         | Astragalus injection, adding 5% glucose solution or 0.9% sodium chloride injection                                    | 1,2                |

|                   |                                  |            |                                                 |                                                             |                                                         |                                                                                                                                                                                                        |                                                                                                                                                                                                                                                                                                                                                                                                                                                                          |     |
|-------------------|----------------------------------|------------|-------------------------------------------------|-------------------------------------------------------------|---------------------------------------------------------|--------------------------------------------------------------------------------------------------------------------------------------------------------------------------------------------------------|--------------------------------------------------------------------------------------------------------------------------------------------------------------------------------------------------------------------------------------------------------------------------------------------------------------------------------------------------------------------------------------------------------------------------------------------------------------------------|-----|
|                   |                                  |            | Control<br>group 21/28                          | 66.46±9.15<br>Control<br>group<br>67.55±8.58                | 2.25±0.84<br>Control<br>group<br>2.19±1.02<br>(year)    | diuretics (hydrochlorothiazide tablets), digitalis preparations and other medicines were fixed and used simultaneously, and the dosage was adjusted according to the patient's condition.              | 250ml in slow intravenous drip, once a day, for 4 weeks                                                                                                                                                                                                                                                                                                                                                                                                                  |     |
| <b>Zhang 2012</b> | Chronic congestive heart failure | 172(86/86) | Experimental group 51/35<br>Control group 36/48 | Experimental group 65.50±11.52<br>Control group 64.50±11.17 | Experimental group 1-23<br>Control group 1-20<br>(year) | Comprehensive treatment of digitalis, diuretics and angiotensin converting enzyme inhibitors                                                                                                           | Astragalus injection was added into 20ml glucose injection 250ml intravenous drip once a day for 14 days                                                                                                                                                                                                                                                                                                                                                                 | 2   |
| <b>Chang 2006</b> | Chronic heart failure            | 50(25/25)  | 28/22                                           | 58.5                                                        | 3.8 (year)                                              | Conventional anti-CHF treatment, including diuretics, cardiac sputum (digoxigenin), angiotensin converting enzyme inhibitors, nitrates and the like. After 2 weeks of stable condition, add carvedilol | Intravenous infusion of 40ml of Astragalus injection, once a day, changed to daily jaundice 40g after 14 days, powdered into the end, the disease was stable for 2 weeks, plus carvedilol, the initial dose of 3.125mg, hemodynamic stability The heart rate is >60 beats/min, and the dose is incremented every 2 weeks, and each time is increased to 2 times of the upper dose until the target dose of 25 mg, 2 times/d or the maximum tolerated dose is maintained. | 1,2 |
| <b>Guo 2005</b>   | Congestive heart failure         | 65(35/30)  | Experimental group 21/14<br>Control             | Experimental group 62.5 ± 7. 2                              | Experimental group 2-15                                 | Bed rest, a diet rich in vitamins and proteins, and avoidance of emotional agitation are all treated                                                                                                   | Astragalus injection 60ml added with 5% glucose injection 250ml intravenously for 30 drops/min once a day for 14 days.                                                                                                                                                                                                                                                                                                                                                   | 1   |

|                  |                                                         |           |                                                 |                                                                   |                                                          |                                                                                                                                                                                           |                                                                                                          |   |
|------------------|---------------------------------------------------------|-----------|-------------------------------------------------|-------------------------------------------------------------------|----------------------------------------------------------|-------------------------------------------------------------------------------------------------------------------------------------------------------------------------------------------|----------------------------------------------------------------------------------------------------------|---|
|                  |                                                         |           | group 18/21                                     | Control group<br>57.25±5.1                                        | Control group 1-18<br>(year)                             | according to CHF routine, including digitalis inhibitors, diuretics, ACEI, etc.                                                                                                           |                                                                                                          |   |
| <b>Zhai 1995</b> | Congestive heart failure                                | 51(34/17) | Experimental group 23/11<br>Control group 12/5  | Experimental group 38-80<br>Control group 41-79                   | Experimental group 6-36<br>Control group 6-36<br>(month) | Heart function class II, III, IV patients take Digoxin tablets 0.25mg, class IV patients plus furosemide 20mg once a day                                                                  | 20 ml of astragalus injection, 10% glucose injection 250ml intravenously once a day, 10 days             | 1 |
| <b>Fan 2003</b>  | Severe pulmonary heart disease with respiratory failure | 92(46/46) | Experimental group 34/12<br>Control group 36/10 | Experimental group<br>63. 6 ±6.8<br>Control group<br>64.5±7.2     |                                                          | Anti-infective, Asthma treatment expectorant, oxygen, cardiac diuretic, vasodilator and other conventional treatments                                                                     | Astragalus injection 40ml plus 5% glucose intravenously, 1 time / d, 10-15d                              | 1 |
| <b>Yan 2013</b>  | Chronic congestive heart failure                        | 96(48/48) | Experimental group 25/23<br>Control group 25/23 | Experimental group<br>65.35±10.50<br>Control group<br>65.35±10.56 | Experimental group 1-20<br>Control group 1-20<br>(year)  | Digitalis, diuretics, angiotensin converting enzyme inhibitors, etc.                                                                                                                      | Astragalus injection 20 ml force into 5% glucose injection 250 ml intravenously once a day for14 days    | 2 |
| <b>Wei 2002</b>  | heart failure from Pulmonary heart disease              | 46(23/23) | Experimental group 13/10<br>Control group 11/12 | Experimental group 25/23<br>Control group 25/23                   | Experimental group 25/23<br>Control group 25/23          | Comprehensive treatments such as anti-infection, oxygen therapy, improved ventilation, diuresis and symptomatic support. Patients with arrhythmia are given Antiarrhythmic treatment, and | 40 ml of Astragalus injection was added to 10% glucose 250 ml intravenously, once a day for 7 to 10 days | 1 |

|                  |                                                    |           |                                                 |                                                         |            |                                                                                                                                                                                                    |                                                                                                                         |   |
|------------------|----------------------------------------------------|-----------|-------------------------------------------------|---------------------------------------------------------|------------|----------------------------------------------------------------------------------------------------------------------------------------------------------------------------------------------------|-------------------------------------------------------------------------------------------------------------------------|---|
|                  |                                                    |           |                                                 |                                                         |            | pay attention to correct water and electrolyte disorders, according to the condition plus the appropriate amount of digitalis drugs for treatment                                                  |                                                                                                                         |   |
| <b>Yuan 2002</b> | heart failure from Pulmonary heart disease         | 94(50/44) | 50/44                                           | 50-70                                                   |            | Anti-infection, oxygen inhalation, cardiac tonicity, diuresis, improvement of ventilation function, etc.                                                                                           | Astragalus injection 12ml added 10% glucose solution 300ml intravenous drip once a day for14 days                       | 1 |
| <b>Su 2017</b>   | chronic heart failure                              | 60(30/30) | Experimental group 12/18<br>Control group 6/24  | Experimental group 70.0±6.91<br>Control group 70.9±10.9 |            | To control risk factors, diuretics, angiotensin-converting enzyme inhibitors (ACEI) or as appropriate Angiotensin receptor antagonists (ARB), beta-blockers, aldosterone antagonists and digitalis | Astragalus injection 20 mL dissolved in 5% glucose injection<br>Static point in 250 mL for 2 weeks                      | 2 |
| <b>Zhao 2017</b> | chronic heart failure                              | 60(30/30) | 24/36                                           | 56-85                                                   | 3-18(year) | Heart strengthening, diuresis, vasodilation, oxygen inhalation, etc.                                                                                                                               | Astragalus injection 30 ml, once a day for 12 days.                                                                     | 2 |
| <b>Yin 2003</b>  | chronic heart failure from Pulmonary heart disease | 87(46/41) | Experimental group 35/11<br>Control group 31/10 | Experimental group 60.3<br>Control group 62.1           |            | Routine oxygen inhalation, anti-infection, antiasthmatic and asthma relief, phlegm and cough relief and symptomatic treatment                                                                      | Astragalus injection 30ml added with 5% glucose injection 250ml intravenous drip once a day, once a day, 10 for 15 days | 1 |
| <b>Wang 2008</b> | chronic heart failure                              | 48(24/24) | Experimental group 13/11                        | Experimental group 48-75                                |            | Routine use of digitalis, diuretics and vasodilators                                                                                                                                               | Astragalus injection (produced by Chengdu Di'ao Group) 40 ml intravenous drip once a                                    | 1 |

|                       |                             |             |                                                       |                                                                       |                                                               |                                                                                                                                                                                                                                                                                                               |                                                                                                                    |     |
|-----------------------|-----------------------------|-------------|-------------------------------------------------------|-----------------------------------------------------------------------|---------------------------------------------------------------|---------------------------------------------------------------------------------------------------------------------------------------------------------------------------------------------------------------------------------------------------------------------------------------------------------------|--------------------------------------------------------------------------------------------------------------------|-----|
|                       |                             |             | Control<br>group 14/10                                | Control<br>group 46-73                                                |                                                               |                                                                                                                                                                                                                                                                                                               | day for 14 days                                                                                                    |     |
| <b>Zhang<br/>2015</b> | heart failure               | 106 (53/53) | Experimental<br>group 30/23<br>Control<br>group 31/22 | Experimental<br>group<br>67.2 ±5.8<br>Control<br>group<br>65. 9 ± 5.3 |                                                               | Statin lipid-lowering, aspirin<br>and/or clopidogrel antiplatelet,<br>beta-blocker inhibiting<br>sympathetic activity, ACEI or<br>ARB drugs delaying ventricular<br>remodeling, spironolactone<br>inhibiting aldosterone receptor,<br>furosemide diuretic reducing<br>cardiac preload                         | Astragalus injection 20 mL + 5% glucose<br>injection 250 mL static point, once a day for<br>14 days                | 2   |
| <b>Zhao 2015</b>      | chronic<br>heart failure    | 93 (51/46)  | 53/44                                                 | 71.5 ± 8.7                                                            |                                                               | Bed rest, oxygen inhalation, loop<br>diuretics, angiotensin converting<br>enzyme inhibitors or angiotensin<br>II receptor antagonists, beta-<br>blockers, positive inotropic drugs,<br>vasodilators and other<br>conventional anti-heart failure<br>treatment, arrhythmia patients<br>take amiodarone tablets | Astragalus injection 40 mL added 0.5%<br>glucose injection 250 mL intravenous drip<br>once a day for 14 days<br>"  | 1,2 |
| <b>Zhou 2001</b>      | Congestive<br>heart failure | 83(41/41)   | Experimental<br>group 24/18<br>Control<br>group 25/16 | Experimental<br>group 68 ±5<br>Control<br>group 67 ±6                 | Experimental<br>group 1-20<br>Control<br>group 1-18<br>(year) | Conventional treatment of CHF<br>includes digitalis preparation,<br>diuretics and angiotensin<br>converting enzyme inhibitors.                                                                                                                                                                                | Astragalus injection 40 ml and 5% glucose<br>injection 500 ml were intravenously dripped<br>once a day for 14 days | 1   |
| <b>Qu 2014</b>        | Congestive                  | 160(80/80)  | Experimental                                          | Experimental                                                          | Experimental                                                  | Digoxin 0.125-0.25 mg once a                                                                                                                                                                                                                                                                                  | Astragalus injection 20 ml plus 5% glucose                                                                         | 2   |

|           |                                                                                   |           |                                                       |                                                       |                                               |                                                                                                                                                                                                                                                                                                                                                                                                                       |                                                                       |   |
|-----------|-----------------------------------------------------------------------------------|-----------|-------------------------------------------------------|-------------------------------------------------------|-----------------------------------------------|-----------------------------------------------------------------------------------------------------------------------------------------------------------------------------------------------------------------------------------------------------------------------------------------------------------------------------------------------------------------------------------------------------------------------|-----------------------------------------------------------------------|---|
|           | heart failure                                                                     |           | group 42/38<br>Control<br>group 43/37                 | group<br>60.55±11.4<br>Control<br>group<br>60.45±11.4 | group 1-20<br>Control<br>group 1-20<br>(year) | day 121 times;<br>Dihydrochlorothiazide tablet 25<br>mg and Spironolactone tablet 20<br>mg twice a day; Captopril 12.5-25<br>mg, 3 times a day. Patients with<br>cardiac function grade IV<br>received intravenous drip of<br>sodium nitroprusside, furosemide,<br>dopamine and dobutamine<br>according to their condition.<br>Corresponding symptomatic<br>treatment was adopted for patients<br>with complications. | injection 100 ml intravenous drip once a day<br>for 14 days           |   |
| Wang 1999 | Pulmonary<br>heart disease<br>with heart<br>failure and<br>respiratory<br>failure | 89(51/38) | Experimental<br>group 31/21<br>Control<br>group 23/15 | group<br>58.3±11<br>Control<br>group<br>60.2±13       |                                               | Oxygen therapy, antibiotics,<br>expectorant and asthma relief,<br>correction of water and<br>electrolyte, acid-base balance,<br>diuresis and respiratory stimulants                                                                                                                                                                                                                                                   | Astragalus injection 40-60 ml added 250 ml<br>saline intravenous drip | 1 |
